# Supplementary material
Source: PubMed Central journal article supplement (PMC6509191)
Supplement: mBio.00715-19-sf001.pdf [file mBio.00715-19-sf001.pdf]

## Initial 6 arCOG seeds:

|                              |                                                                                  |
|------------------------------|----------------------------------------------------------------------------------|
| <b>arCOG12091</b> (COG03501) | Vgr/Rhs element, implicated in secretion of polymorphic toxins or phage assembly |
| <b>arCOG10240</b> (COG03501) | Vgr/Rhs element, implicated in secretion of polymorphic toxins or phage assembly |
| <b>arCOG12924</b> (COG03501) | Vgr/Rhs element, implicated in secretion of polymorphic toxins or phage assembly |
| <b>arCOG11410</b>            | T4-like virus tail tube protein gp19                                             |
| <b>arCOG11413</b>            | T4-like virus tail tube protein gp19                                             |
| <b>arCOG11414</b>            | Phage tail sheath protein                                                        |

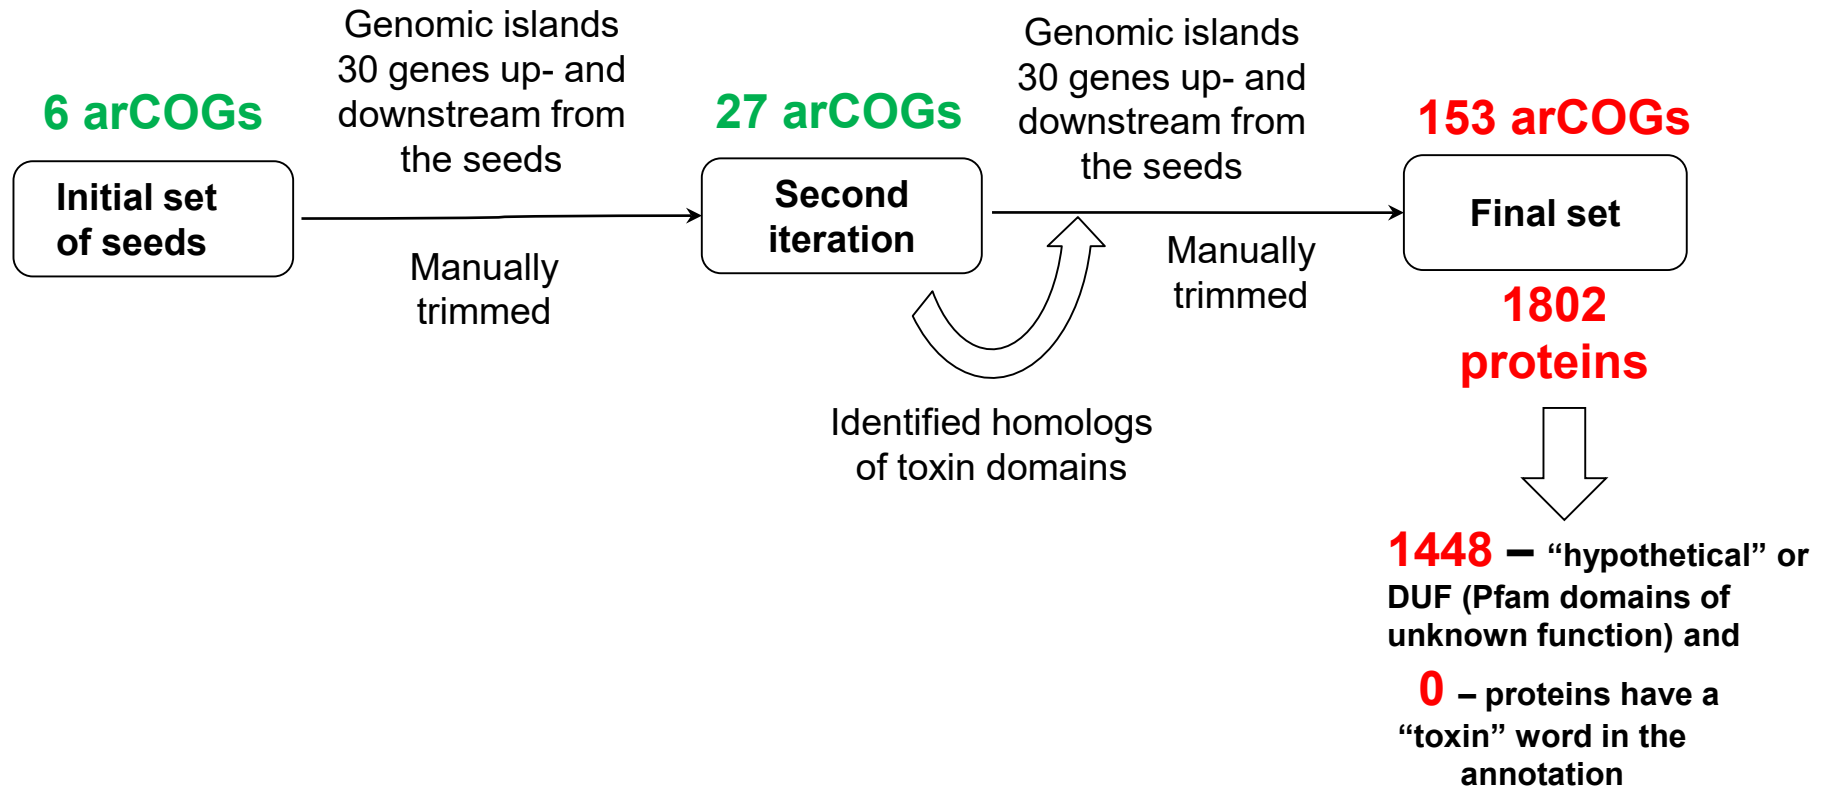

**Supplementary Figure S1.** Iterative “guilt-by association” computational pipeline for identification of polymorphic toxin loci.
